# Supplementary material
Source: ML conference proceedings conference paper supplement (https://openreview.net/forum?id=oMmU0Hj4IpP)
Supplement: supplementary_material [file attachment]

# Case2\_slice78

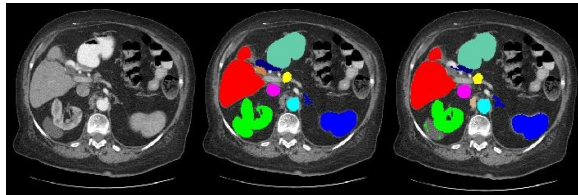

# Case3\_slice73

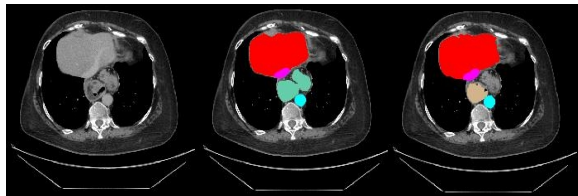

# Case31\_slice49

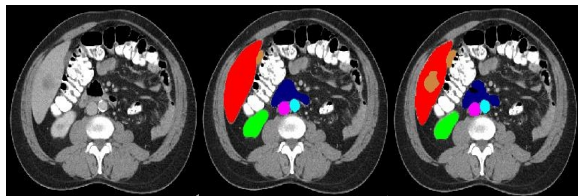

(a) Failed Cases

# Case6\_slice78

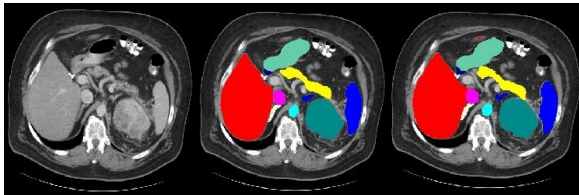

# Case8\_slice118

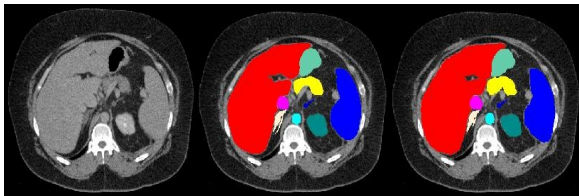

# Case35\_slice95

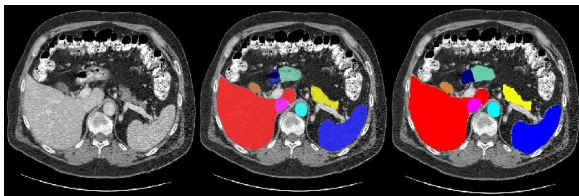

(b) Successful Cases
