# Supplementary material
Source: ML conference proceedings conference paper supplement (https://openreview.net/forum?id=oMmU0Hj4IpP)

Coarse Segmentation  
(128,128,128)

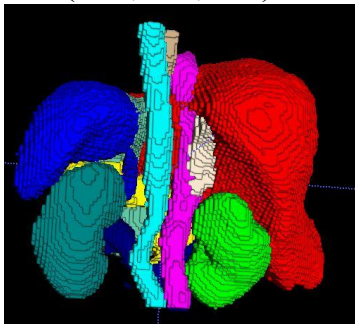

Large organs are  
correctly located

Small organs  
localization  
(128, 128, 128)

Localization Complete

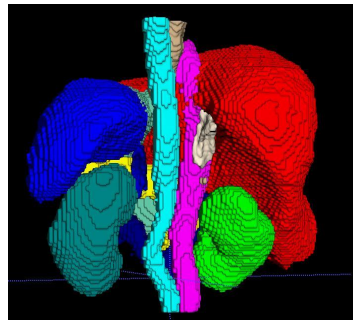

Fine Segmentation

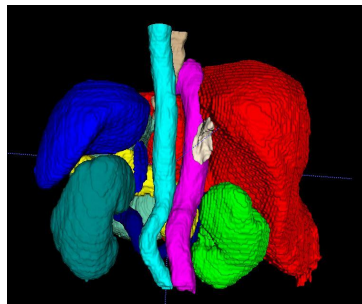

Liver+Spleen+kidneys

(160,160,160)

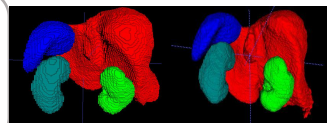

Stomach+Pancreas  
+Duodenum  
(160,160,160)

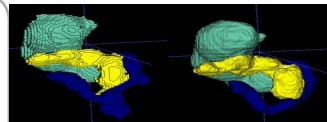

Aorta+IVC

(160,160,160)

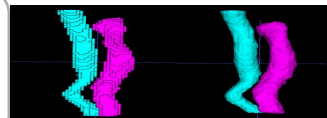

Small Organs

(128, 128, 128)

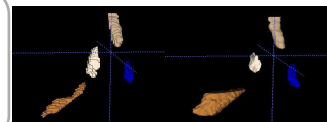

Supplement: supplementary_material [file attachment]
