# Supplementary material
Source: ML conference proceedings conference paper supplement (https://openreview.net/forum?id=oMmU0Hj4IpP)

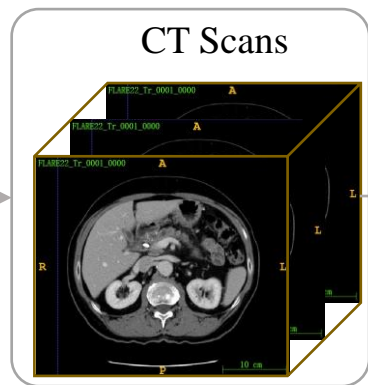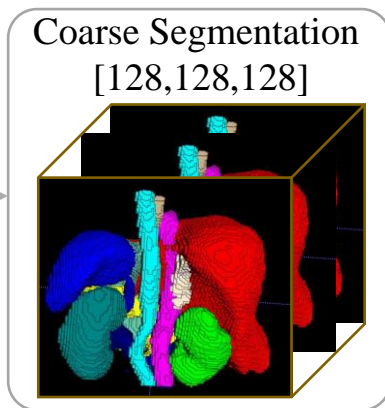

Large organs are  
correctly located

Small Organs  
Re-location  
[64,256,256]

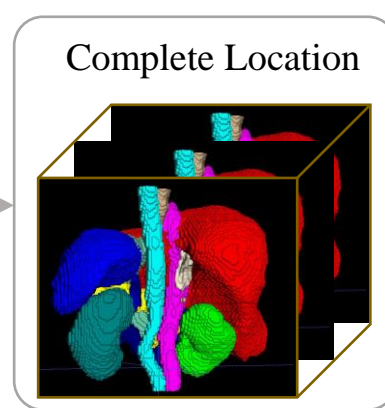

Liver+Spleen+Kidneys  
[160,160,160]

Stomach+Panc+Duod  
[160,160,160]

Aorta + IVC  
[160,160,160]

Small Organs  
[64,256,256]

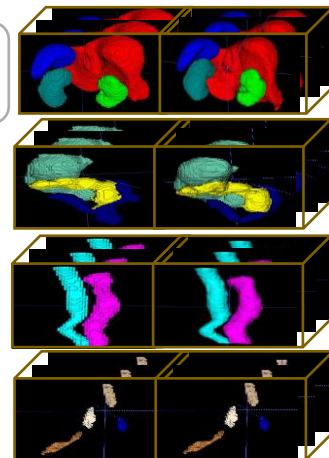

Fine Segmentation

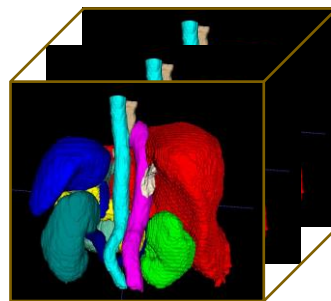

Supplement: supplementary_material [file attachment]
